# Supplementary material for: Fabrication of Cr doped SnO2 nanoparticles based biosensor for the selective determination of riboflavin in pharmaceuticals
Source: Royal Society of Chemistry journal article supplement (doi:10.1039/c3an36754a), 2013-01-01
Supplement: c3an36754a.pdf [file c3an36754a.pdf]

## Supporting Information (SI)

### **Fabrication of Cr doped SnO<sub>2</sub> nanoparticles based biosensor for the selective determination of riboflavin in pharmaceuticals**

**N. Lavanya, S. Radhakrishnan, C. Sekar<sup>a,b\*</sup>, M. Navaneethan<sup>b</sup> and Y. Hayakawa<sup>b</sup>**

<sup>a</sup> *Department of Bioelectronics and Biosensors, Alagappa University, Karaikudi-630 003, Tamilnadu, India.*

<sup>b</sup> *Research Institute of Electronics, Shizuoka University, Hamamatsu-432-8011, Japan.*

*\*E-mail: Sekar2025@gmail.com*

*Phone: +91 94425663637. Fax: +91 4565 225202.*

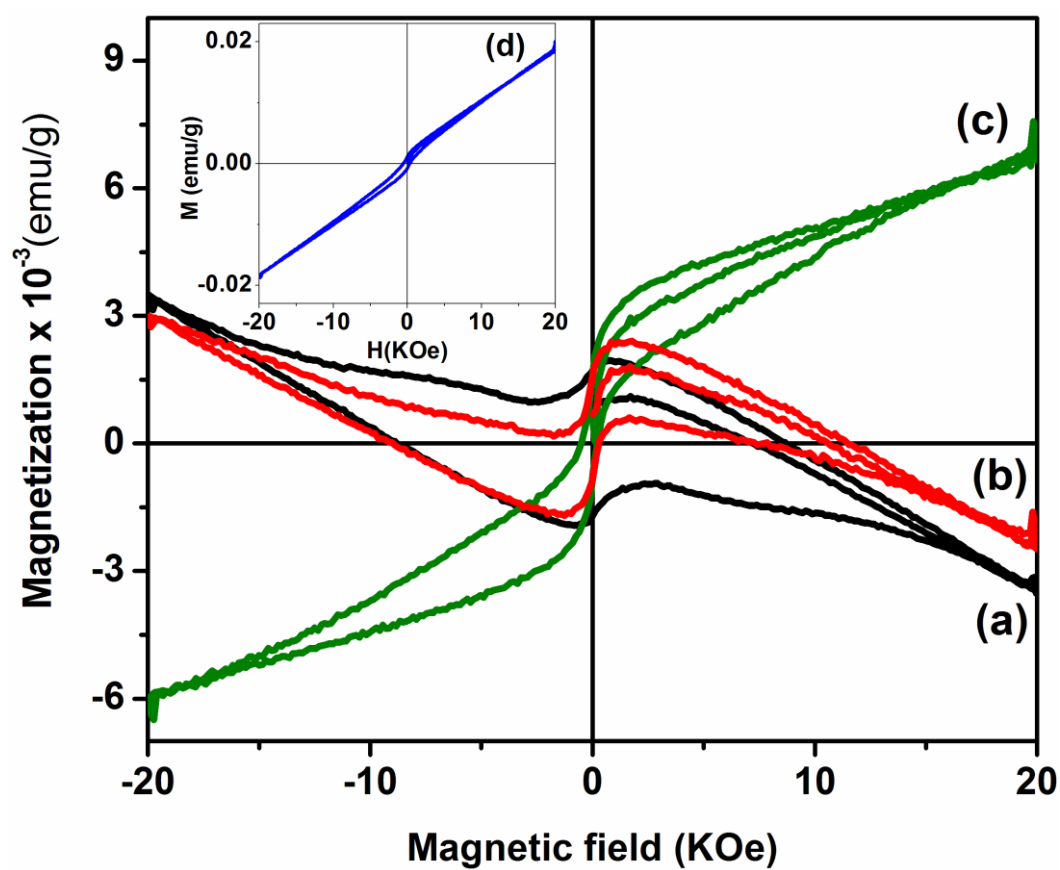

**Fig. S1** M-H curves of (a) undoped SnO<sub>2</sub>, (b) 1 wt%, and (c) 3 wt% Cr doped SnO<sub>2</sub> nanoparticles. An inset shows the weak ferromagnetic behaviour of 5 wt% Cr-SnO<sub>2</sub>.

**Table S1** Variation of grain size, lattice parameters ( $a$  and  $c$ ) of the unit cell and cell volume with Cr concentration.

| Dopant Concentration (wt %) | Crystallite size (nm) | Lattice Parameter $a$ (Å) | Lattice Parameter $c$ (Å) | Cell volume (Å <sup>3</sup> ) |
|-----------------------------|-----------------------|---------------------------|---------------------------|-------------------------------|
| 0                           | 19                    | 4.739                     | 3.185                     | 71.529                        |
| 1                           | 15                    | 4.732                     | 3.181                     | 71.228                        |
| 3                           | 13                    | 4.725                     | 3.178                     | 70.950                        |
| 5                           | 11                    | 4.718                     | 3.169                     | 70.539                        |

**Table S2** Effect of interference on RF determination for the nano-Cr-SnO<sub>2</sub> modified electrode

| Interfering species | Interferents concentration (μM) | Concentration ratio (Riboflavin: Interferents) | Recovery (%) |
|---------------------|---------------------------------|------------------------------------------------|--------------|
| L-ascorbic acid     | 10                              | 1:10                                           | 114          |
| Uric acid           | 10                              | 1:10                                           | 109          |
| Serotonin           | 10                              | 1:10                                           | 94           |
| Epineprine          | 10                              | 1:10                                           | 96           |
| Cystamine           | 10                              | 1:10                                           | 90           |
| Dopamine            | 10                              | 1:10                                           | 85           |
| Tyrosine            | 10                              | 1:10                                           | 102          |
| Fe                  | 100                             | 1:100                                          | 91           |
| Mg                  | 100                             | 1:100                                          | 111          |
| Ca                  | 100                             | 1:100                                          | 96           |
| RF                  | 1                               | -                                              | -            |

**Table S3** Comparison of the responses of other riboflavin sensors

| Electrode Materials                                 | Detection limit                                                                                          | Linear range                                                 | Author                    |
|-----------------------------------------------------|----------------------------------------------------------------------------------------------------------|--------------------------------------------------------------|---------------------------|
| <sup>a</sup> P3MT/GCE                               | $5.0 \times 10^{-8} \text{ mol L}^{-1}$                                                                  | $1.0 \times 10^{-7} - 2.0 \times 10^{-4} \text{ mol L}^{-1}$ | Zhang et al. (2010)       |
| <sup>b</sup> CILE                                   | 0.1 nM                                                                                                   | 0.8–110nM                                                    | Safavi et al. (2010)      |
| <sup>c</sup> Ds-DNA/PCE                             | $0.34 \mu\text{g mL}^{-1}$                                                                               | $0.5\text{--}70 \mu\text{g mL}^{-1}$                         | Ensafi et al. (2012)      |
| <sup>d</sup> Aza /PCPE                              | $0.2 \text{ ng cm}^{-3}$                                                                                 | $0.5 \text{ ng cm}^{-3}$ to $70 \mu\text{g cm}^{-3}$         | Kotkar et al. (2007)      |
| <sup>e</sup> AgSAEs                                 | $8.2 \times 10^{-10} \text{ mol L}^{-1}$ (m-AgSAE) and $1.3 \times 10^{-9} \text{ mol L}^{-1}$ (p-AgSAE) | -                                                            | Bandzuchova et al. (2012) |
| <sup>f</sup> DNA/CNT                                | $0.2 \text{ ng L}^{-1}$ ( $5.31 \times 10^{-13} \text{ mol L}^{-1}$ )                                    | -                                                            | Ly et al. (2012)          |
| <sup>g</sup> WO <sub>3</sub> -TiO <sub>2</sub> /ITO | $1.87 \times 10^{-7} \text{ M}$                                                                          | $3.23 \times 10^{-7}$ to $4.0 \times 10^{-5} \text{ M}$      | Li et al. (2012)          |
| <sup>h</sup> Cr-SnO <sub>2</sub> /GCE               | 107 nM                                                                                                   | $0.2 \times 10^{-6}$ to $1.0 \times 10^{-4} \text{ M}$       | This work                 |

<sup>a</sup> Poly (3- methylthiophene) modified glassy carbon electrode

<sup>b</sup> Carbon ionic liquid electrode

<sup>c</sup> Pencil graphite electrode

<sup>d</sup> Plain carbon paste/aza crown ethers modified electrode

<sup>e</sup> Silver solid amalgam electrodes

<sup>f</sup> DNA/ carbon nanotube paste electrode

<sup>g</sup> WO<sub>3</sub> – TiO<sub>2</sub> composite modified indium tin oxide electrode

<sup>h</sup> Cr doped SnO<sub>2</sub> nanoparticles modified glassy carbon electrode

### References for Table S3

- (1) Zhang, H.; Zhao, J.; Liu, H.; Wang, H.; Liu, R.; Liu, J. *Int. J. Electrochem. Sci.* **2010**, *5*, 295–301.
- (2) Ensafi, A. A.; Heydari-Bafrooei, E.; Amini, M.; *Biosens. Bioelectron.* **2012**, *31*, 376–381.
- (3) Kotkar, M.; Desai, P. B.; Srivastava, A. K. *Sensor Actuat. B*, **2007**, *124*, 90–98.
- (4) Safavi, A.; Maleki, N.; Ershadifar, H.; Tajabadi, F. *Anal. Chim. Acta.* **2010**, *674*, 176–181.
- (5) Bandzuchova, L.; Selesovska, R.; Navratil, T.; Chylkov, J.; Novotny, L. *Electrochim. Acta.* **2012**, *75*, 316–324.
- (6) Ly, Y.; Yoo, H. S.; Ahn, J. Y.; Nam, k. h. *Food Chem.* **2011**, *127*, 270–274.

(7) Li, Y.; Hsu, P-C.; Chen, S-M. *Sensor Actuat. B.*  
10.1016/j.snb.2012.06.061.
